# Supplementary material
Source: Springer Nature journal article supplement (https://www.springermedizin.de/resource/supplementary/12876_2010_595_MOESM12_ESM.pdf/9437344)

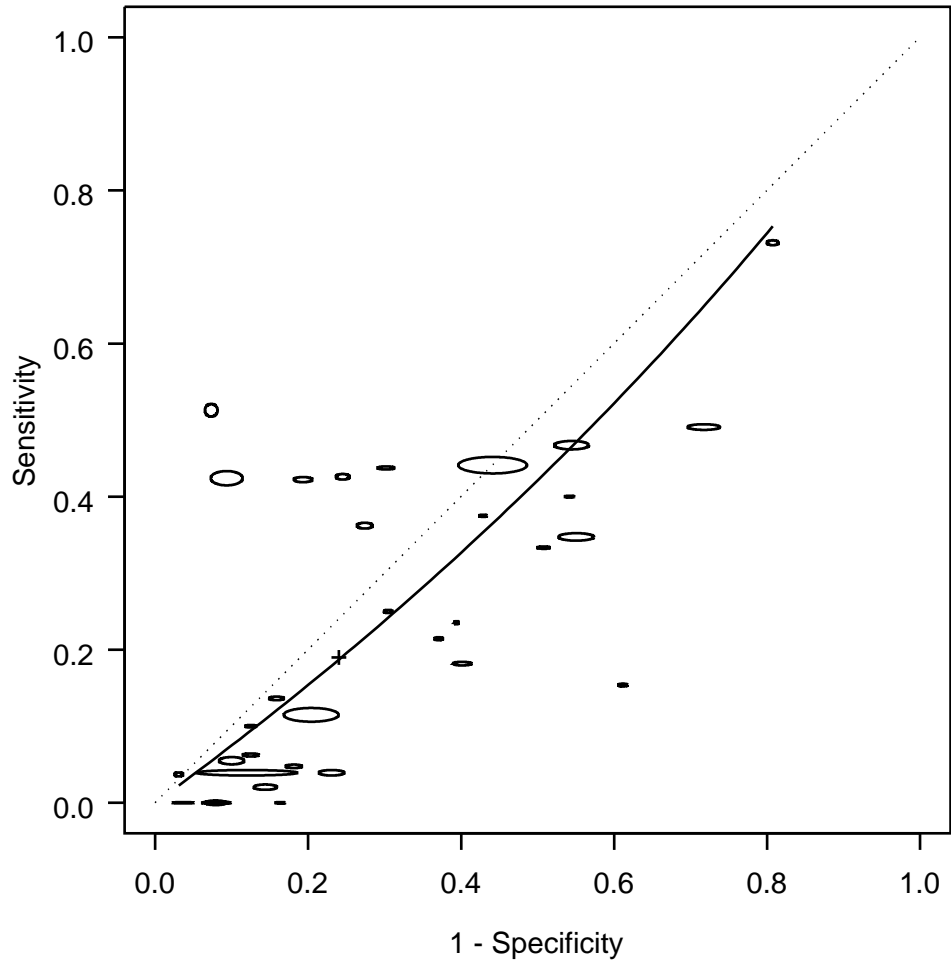

Supplement: MOESM12 [file 9437344]
